# Supplementary material for: Synthesis and characterization of new barium methylphosphonates
Source: Royal Society of Chemistry journal article supplement (doi:10.1039/c7dt00492c), 2017-01-01
Supplement: c7dt00492c2.pdf [file c7dt00492c2.pdf]

SUPPLEMENTARY INFORMATION

# Synthesis and characterization of new barium methylphosphonates

Klára Melánová,<sup>a</sup> Ludvík Beneš,<sup>b</sup> Jan Svoboda,<sup>c</sup> Vítězslav Zima,<sup>\*a</sup> Milan Vlček,<sup>a</sup> Miroslava Trchová<sup>a</sup>

<sup>a</sup> *Institute of Macromolecular Chemistry of Academy of Sciences of the Czech Republic, Heyrovský Sq. 2, 162 06 Prague 6, Czech Republic. E-mail: vitezslav.zima@upce.cz*

<sup>b</sup> *Joint Laboratory of Solid State Chemistry, Faculty of Chemical Technology, University of Pardubice, Studentská 95, 532 10 Pardubice, Czech Republic*

<sup>c</sup> *Institute of Organic Chemistry and Technology, Faculty of Chemical Technology, University of Pardubice, Studentská 573, 532 10 Pardubice, Czech Republic*

**Table 1: BaCH<sub>3</sub>PO<sub>3</sub>·3H<sub>2</sub>O**

DICVOL91:

M(20) = 37.9

F(20) = 86.3(0.0037, 63)

CHEKCELL (cell refinement):

Monoclinic P2<sub>1</sub>/c

a = 11.7466 (13) Å

b = 23.0236 (23) Å

c = 8.9380 (11) Å

β = 108.91 (1)°

V = 2286.74 (7) Å<sup>3</sup>

| 2θ <sub>obs</sub> | d <sub>obs</sub> Å | Intensity | h  | k | l | 2θ <sub>calc</sub> | d <sub>calc</sub> Å | 2θ <sub>obs</sub> -2θ <sub>calc</sub> |
|-------------------|--------------------|-----------|----|---|---|--------------------|---------------------|---------------------------------------|
| 7.671             | 11.51630           | 999       | 0  | 2 | 0 | 7.674              | 11.51180            | -0.003                                |
| 8.823             | 10.01440           | 91        | -1 | 1 | 0 | 8.829              | 10.00760            | -0.006                                |
| 11.137            | 7.93860            | 14        | 0  | 1 | 1 | 11.139             | 7.93700             | -0.002                                |
| 11.541            | 7.66130            | 10        | -1 | 1 | 1 | 11.553             | 7.65340             | -0.012                                |
| 12.978            | 6.81600            | 42        | 0  | 2 | 1 | 12.981             | 6.81460             | -0.003                                |
| 13.335            | 6.63450            | 43        | -1 | 2 | 1 | 13.339             | 6.63260             | -0.004                                |
| 14.015            | 6.31400            | 9         | -1 | 3 | 0 | 14.013             | 6.31490             | 0.002                                 |
| 15.382            | 5.75600            | 22        | 0  | 4 | 0 | 15.382             | 5.75590             | 0.000                                 |
| 15.579            | 5.68340            | 16        | 0  | 3 | 1 | 15.581             | 5.68270             | -0.002                                |
| 15.934            | 5.55750            | 35        | 2  | 0 | 0 | 15.938             | 5.55610             | -0.004                                |
| 16.399            | 5.40120            | 45        | -2 | 1 | 0 | 16.399             | 5.40110             | 0.000                                 |
| 17.713            | 5.00310            | 36        | -2 | 2 | 0 | 17.711             | 5.00380             | 0.003                                 |
| 19.710            | 4.50060            | 22        | -2 | 3 | 0 | 19.710             | 4.50050             | 0.000                                 |
| 20.877            | 4.25170            | 6         | -1 | 5 | 0 | 20.865             | 4.25390             | 0.011                                 |
| 21.351            | 4.15830            | 17        | 0  | 1 | 2 | 21.351             | 4.15820             | 0.000                                 |
| 22.211            | 3.99910            | 47        | -2 | 4 | 0 | 22.220             | 3.99750             | -0.009                                |
| 23.157            | 3.83790            | 54        | 0  | 6 | 0 | 23.161             | 3.83720             | -0.004                                |
| 24.011            | 3.70320            | 61        | 0  | 3 | 2 | 24.013             | 3.70300             | -0.001                                |
| 24.314            | 3.65780            | 12        | -3 | 1 | 0 | 24.319             | 3.65710             | -0.005                                |
| 24.812            | 3.58550            | 22        | 1  | 0 | 2 | 24.822             | 3.58410             | -0.010                                |
| 25.143            | 3.53910            | 83        | -2 | 5 | 1 | 25.127             | 3.54120             | 0.016                                 |
| 25.239            | 3.52580            | 164       | -1 | 4 | 2 | 25.237             | 3.52600             | 0.002                                 |
| 25.479            | 3.49310            | 32        | 0  | 6 | 1 | 25.471             | 3.49430             | 0.008                                 |
| 25.651            | 3.47010            | 26        | -1 | 6 | 1 | 25.660             | 3.46900             | -0.009                                |
| 26.032            | 3.42020            | 11        | 1  | 2 | 2 | 26.017             | 3.42210             | 0.015                                 |
| 26.320            | 3.38340            | 33        | -3 | 0 | 2 | 26.332             | 3.38190             | -0.012                                |
| 26.608            | 3.34750            | 20        | -3 | 1 | 2 | 26.620             | 3.34600             | -0.012                                |
| 27.458            | 3.24570            | 51        | -3 | 2 | 2 | 27.466             | 3.24480             | -0.008                                |
| 27.643            | 3.22440            | 10        | -3 | 4 | 1 | 27.668             | 3.22150             | -0.026                                |
| 28.243            | 3.15720            | 27        | -2 | 6 | 0 | 28.241             | 3.15740             | 0.002                                 |

|        |         |     |    |    |   |        |         |        |
|--------|---------|-----|----|----|---|--------|---------|--------|
| 28.648 | 3.11360 | 26  | 0  | 5  | 2 | 28.642 | 3.11420 | 0.006  |
| 29.265 | 3.04930 | 10  | -1 | 7  | 1 | 29.275 | 3.04820 | -0.011 |
| 30.435 | 2.93460 | 21  | 2  | 0  | 2 | 30.412 | 2.93680 | 0.023  |
| 30.703 | 2.90970 | 53  | -1 | 6  | 2 | 30.709 | 2.90910 | -0.006 |
| 31.052 | 2.87770 | 57  | 0  | 8  | 0 | 31.050 | 2.87790 | 0.002  |
| 31.458 | 2.84150 | 15  | 0  | 6  | 2 | 31.460 | 2.84140 | -0.002 |
| 31.594 | 2.82960 | 37  | -2 | 7  | 0 | 31.586 | 2.83030 | 0.009  |
| 32.441 | 2.75760 | 105 | -4 | 1  | 0 | 32.436 | 2.75810 | 0.005  |
| 34.301 | 2.61220 | 11  | -4 | 3  | 0 | 34.301 | 2.61220 | 0.000  |
| 35.094 | 2.55500 | 28  | -2 | 7  | 2 | 35.093 | 2.55500 | 0.000  |
| 35.334 | 2.53820 | 12  | -3 | 6  | 2 | 35.349 | 2.53710 | -0.015 |
| 35.959 | 2.49550 | 24  | -4 | 4  | 2 | 35.951 | 2.49600 | 0.008  |
| 37.086 | 2.42220 | 18  | 1  | 7  | 2 | 37.068 | 2.42330 | 0.018  |
| 37.295 | 2.40910 | 16  | 3  | 1  | 2 | 37.275 | 2.41040 | 0.020  |
| 37.802 | 2.37790 | 13  | -4 | 5  | 0 | 37.790 | 2.37870 | 0.013  |
| 38.972 | 2.30920 | 34  | 3  | 3  | 2 | 38.937 | 2.31120 | 0.034  |
| 39.091 | 2.30240 | 52  | 0  | 10 | 0 | 39.093 | 2.30230 | -0.002 |
| 39.375 | 2.28650 | 13  | -5 | 1  | 2 | 39.377 | 2.28640 | -0.002 |
| 40.415 | 2.23000 | 17  | -2 | 0  | 4 | 40.405 | 2.23050 | 0.010  |
| 40.589 | 2.22090 | 18  | 0  | 10 | 1 | 40.578 | 2.22150 | 0.012  |
| 40.959 | 2.20170 | 22  | -5 | 3  | 2 | 40.968 | 2.20120 | -0.009 |
| 41.181 | 2.19030 | 30  | -4 | 7  | 1 | 41.176 | 2.19050 | 0.005  |
| 41.709 | 2.16380 | 14  | -2 | 9  | 2 | 41.705 | 2.16400 | 0.004  |
| 42.126 | 2.14330 | 36  | 1  | 10 | 1 | 42.121 | 2.14360 | 0.005  |
| 42.565 | 2.12220 | 25  | -4 | 7  | 0 | 42.563 | 2.12230 | 0.003  |
| 43.456 | 2.08080 | 12  | -3 | 3  | 4 | 43.445 | 2.08120 | 0.010  |
| 44.015 | 2.05560 | 22  | 2  | 8  | 2 | 44.017 | 2.05550 | -0.003 |
| 44.426 | 2.03750 | 14  | 0  | 3  | 4 | 44.417 | 2.03790 | 0.009  |
| 46.327 | 1.95830 | 12  | -2 | 11 | 0 | 46.317 | 1.95870 | 0.011  |
| 46.536 | 1.95000 | 8   | 3  | 1  | 3 | 46.514 | 1.95090 | 0.023  |
| 47.412 | 1.91590 | 11  | -6 | 2  | 2 | 47.396 | 1.91660 | 0.017  |
| 47.731 | 1.90390 | 8   | -3 | 10 | 2 | 47.750 | 1.90320 | -0.019 |
| 48.333 | 1.88160 | 29  | -4 | 9  | 0 | 48.326 | 1.88180 | 0.007  |
| 49.020 | 1.85680 | 11  | -4 | 5  | 4 | 49.028 | 1.85650 | -0.008 |
| 49.318 | 1.84630 | 6   | -6 | 1  | 0 | 49.324 | 1.84610 | -0.005 |
| 50.672 | 1.80010 | 8   | 4  | 6  | 2 | 50.674 | 1.80000 | -0.002 |
| 51.831 | 1.76250 | 20  | -1 | 12 | 2 | 51.831 | 1.76250 | 0.001  |
| 52.354 | 1.74610 | 10  | 2  | 3  | 4 | 52.387 | 1.74510 | -0.033 |
| 52.991 | 1.72660 | 8   | -4 | 7  | 4 | 52.990 | 1.72670 | 0.001  |
| 53.249 | 1.71890 | 7   | -6 | 5  | 0 | 53.269 | 1.71830 | -0.020 |
| 54.872 | 1.67180 | 15  | -4 | 11 | 0 | 54.876 | 1.67170 | -0.004 |
| 56.698 | 1.62220 | 5   | -6 | 4  | 4 | 56.692 | 1.62240 | 0.006  |
| 59.872 | 1.54360 | 8   | 5  | 7  | 2 | 59.883 | 1.54330 | -0.011 |
| 62.084 | 1.49380 | 8   | 1  | 10 | 4 | 62.084 | 1.49380 | 0.000  |
| 64.716 | 1.43920 | 8   | 0  | 16 | 0 | 64.730 | 1.43900 | -0.014 |
| 66.633 | 1.40240 | 8   | -5 | 13 | 2 | 66.617 | 1.40270 | 0.016  |
| 67.377 | 1.38870 | 10  | 2  | 13 | 3 | 67.376 | 1.38880 | 0.001  |
| 67.922 | 1.37890 | 7   | -8 | 5  | 3 | 67.908 | 1.37920 | 0.014  |
| 74.047 | 1.27930 | 8   | 5  | 5  | 4 | 74.072 | 1.27890 | -0.025 |

**Table 2: Anhydrous  $\alpha$ -BaCH<sub>3</sub>PO<sub>3</sub> prepared from BaCH<sub>3</sub>PO<sub>3</sub>·3H<sub>2</sub>O, dehydrated at 500°C, measured at room temperature.**

| $2\theta_{\text{obs}}$ | $d_{\text{obs}} \text{ \AA}$ | Intensity |
|------------------------|------------------------------|-----------|
| 9.100                  | 9.70992                      | 999       |
| 18.269                 | 4.85216                      | 4         |
| 20.969                 | 4.23310                      | 32        |
| 21.646                 | 4.10228                      | 15        |
| 21.818                 | 4.07028                      | 20        |
| 23.181                 | 3.83389                      | 20        |
| 24.691                 | 3.60281                      | 469       |
| 25.553                 | 3.48321                      | 22        |
| 26.939                 | 3.30701                      | 122       |
| 27.576                 | 3.23209                      | 142       |
| 28.495                 | 3.12987                      | 43        |
| 30.900                 | 2.89150                      | 120       |
| 31.117                 | 2.87187                      | 73        |
| 32.565                 | 2.74738                      | 33        |
| 32.768                 | 2.73083                      | 49        |
| 36.304                 | 2.47258                      | 10        |
| 37.064                 | 2.42360                      | 7         |
| 38.551                 | 2.33343                      | 34        |
| 38.981                 | 2.30873                      | 76        |
| 41.636                 | 2.16739                      | 39        |
| 42.013                 | 2.14883                      | 44        |
| 42.662                 | 2.11765                      | 19        |
| 43.371                 | 2.08465                      | 19        |
| 44.238                 | 2.04576                      | 15        |
| 46.280                 | 1.96014                      | 48        |
| 46.902                 | 1.93560                      | 50        |
| 47.091                 | 1.92826                      | 60        |

**Table 3: BaCH<sub>3</sub>PO<sub>3</sub>·H<sub>2</sub>O**

DICVOL91:

M(20) = 24.8

F(20) = 44.9(0.0062, 72)

CHEKCELL:

Monoclinic P2<sub>1</sub>/c, P2<sub>1</sub>/n

a = 20.5115 (4) Å

b = 7.2172 (1) Å

c = 7.4920 (1) Å

β = 95.52 (1)°

V = 1103.9 (2) Å<sup>3</sup>

| 2θ <sub>obs</sub> | d <sub>obs</sub> Å | Intensity | h  | k | l | 2θ <sub>calc</sub> | d <sub>calc</sub> Å | 2θ <sub>obs</sub> -2θ <sub>calc</sub> |
|-------------------|--------------------|-----------|----|---|---|--------------------|---------------------|---------------------------------------|
| 8.659             | 10.20400           | 999       | 2  | 0 | 0 | 8.655              | 10.20830            | 0.004                                 |
| 12.996            | 6.80690            | 7         | -1 | 1 | 0 | 13.000             | 6.80470             | -0.004                                |
| 17.082            | 5.18660            | 2         | 0  | 1 | 1 | 17.083             | 5.18610             | -0.001                                |
| 17.371            | 5.10100            | 8         | 4  | 0 | 0 | 17.360             | 5.10410             | 0.011                                 |
| 17.896            | 4.95250            | 22        | -3 | 1 | 0 | 17.900             | 4.95140             | -0.004                                |
| 18.656            | 4.75250            | 5         | -2 | 1 | 1 | 18.650             | 4.75390             | 0.006                                 |
| 23.598            | 3.76710            | 10        | -4 | 1 | 1 | 23.605             | 3.76600             | -0.007                                |
| 23.847            | 3.72840            | 4         | 0  | 0 | 2 | 23.846             | 3.72860             | 0.001                                 |
| 24.606            | 3.61500            | 3         | -2 | 0 | 2 | 24.598             | 3.61620             | 0.008                                 |
| 25.038            | 3.55370            | 36        | -1 | 2 | 0 | 25.038             | 3.55360             | -0.001                                |
| 26.179            | 3.40130            | 92        | -2 | 2 | 0 | 26.171             | 3.40240             | 0.008                                 |
| 26.888            | 3.31320            | 3         | 0  | 1 | 2 | 26.892             | 3.31270             | -0.005                                |
| 27.607            | 3.22860            | 12        | -1 | 2 | 1 | 27.602             | 3.22900             | 0.004                                 |
| 27.972            | 3.18720            | 26        | 1  | 2 | 1 | 27.971             | 3.18730             | 0.002                                 |
| 28.212            | 3.16060            | 7         | -4 | 0 | 2 | 28.226             | 3.15910             | -0.014                                |
| 28.946            | 3.08210            | 2         | -3 | 1 | 2 | 28.927             | 3.08410             | 0.019                                 |
| 30.307            | 2.94680            | 4         | -4 | 2 | 0 | 30.309             | 2.94660             | -0.002                                |
| 30.408            | 2.93720            | 7         | -6 | 1 | 1 | 30.414             | 2.93660             | -0.006                                |
| 30.991            | 2.88330            | 13        | 3  | 1 | 2 | 30.992             | 2.88310             | -0.001                                |
| 32.391            | 2.76180            | 7         | 6  | 1 | 1 | 32.394             | 2.76150             | -0.003                                |
| 33.104            | 2.70390            | 7         | -5 | 2 | 0 | 33.102             | 2.70400             | 0.002                                 |
| 33.879            | 2.64380            | 8         | -6 | 0 | 2 | 33.886             | 2.64320             | -0.007                                |
| 34.527            | 2.59570            | 7         | -5 | 2 | 1 | 34.527             | 2.59560             | -0.001                                |
| 35.142            | 2.55160            | 82        | 1  | 2 | 2 | 35.148             | 2.55120             | -0.006                                |
| 36.257            | 2.47570            | 5         | -6 | 2 | 0 | 36.256             | 2.47570             | 0.001                                 |
| 37.430            | 2.40070            | 2         | -6 | 2 | 1 | 37.435             | 2.40040             | -0.006                                |
| 38.273            | 2.34980            | 5         | 0  | 1 | 3 | 38.265             | 2.35020             | 0.008                                 |
| 38.490            | 2.33700            | 2         | -2 | 1 | 3 | 38.485             | 2.33730             | 0.004                                 |
| 39.330            | 2.28900            | 1         | 0  | 3 | 1 | 39.320             | 2.28960             | 0.011                                 |
| 39.706            | 2.26820            | 8         | -3 | 3 | 0 | 39.705             | 2.26820             | 0.001                                 |

|        |         |    |     |   |   |        |         |        |
|--------|---------|----|-----|---|---|--------|---------|--------|
| 40.094 | 2.24720 | 3  | 2   | 1 | 3 | 40.113 | 2.24610 | -0.020 |
| 40.401 | 2.23080 | 8  | -9  | 0 | 1 | 40.399 | 2.23090 | 0.002  |
| 40.650 | 2.21770 | 10 | -7  | 2 | 1 | 40.665 | 2.21690 | -0.015 |
| 41.686 | 2.16490 | 1  | -9  | 1 | 0 | 41.702 | 2.16410 | -0.016 |
| 43.009 | 2.10130 | 2  | 7   | 1 | 2 | 43.000 | 2.10180 | 0.010  |
| 43.635 | 2.07260 | 6  | -5  | 3 | 0 | 43.632 | 2.07280 | 0.003  |
| 43.758 | 2.06710 | 2  | 4   | 3 | 1 | 43.774 | 2.06640 | -0.016 |
| 44.082 | 2.05270 | 2  | -1  | 2 | 3 | 44.072 | 2.05310 | 0.009  |
| 44.347 | 2.04100 | 8  | 10  | 0 | 0 | 44.332 | 2.04170 | 0.015  |
| 44.787 | 2.02200 | 3  | -1  | 3 | 2 | 44.785 | 2.02210 | 0.002  |
| 45.183 | 2.00520 | 4  | -7  | 2 | 2 | 45.170 | 2.00570 | 0.013  |
| 46.139 | 1.96580 | 1  | -3  | 3 | 2 | 46.134 | 1.96600 | 0.006  |
| 46.521 | 1.95060 | 1  | -9  | 1 | 2 | 46.508 | 1.95110 | 0.013  |
| 46.671 | 1.94470 | 3  | -10 | 1 | 1 | 46.672 | 1.94460 | -0.001 |
| 47.349 | 1.91840 | 3  | 3   | 2 | 3 | 47.337 | 1.91880 | 0.013  |
| 47.897 | 1.89770 | 3  | -9  | 2 | 1 | 47.900 | 1.89760 | -0.003 |
| 48.071 | 1.89120 | 2  | -5  | 2 | 3 | 48.077 | 1.89100 | -0.005 |
| 48.801 | 1.86460 | 2  | 0   | 0 | 4 | 48.810 | 1.86430 | -0.009 |
| 49.037 | 1.85620 | 3  | -7  | 3 | 0 | 49.045 | 1.85590 | -0.008 |
| 49.960 | 1.82410 | 5  | 9   | 2 | 1 | 49.952 | 1.82430 | 0.008  |

**Table 4: anhydrous  $\beta$ -BaCH<sub>3</sub>PO<sub>3</sub> prepared from BaCH<sub>3</sub>PO<sub>3</sub>·H<sub>2</sub>O, measured at 215°C**

DICVOL91:

M(20) = 29.2

F(20) = 48.5(0.0090, 46)

CHEKCELL (cell refinement):

Monoclinic P2<sub>1</sub>/c

a = 8.4443 (30) Å

b = 7.2504 (27) Å

c = 7.4561 (28) Å

 $\beta$  = 99.80 (1)°V = 449.83 (5) Å<sup>3</sup>

| 2 $\theta_{\text{obs}}$ | d <sub>obs</sub> Å | Intensity | h  | k | l | 2 $\theta_{\text{calc}}$ | d <sub>calc</sub> Å | 2 $\theta_{\text{obs}}$ -2 $\theta_{\text{calc}}$ |
|-------------------------|--------------------|-----------|----|---|---|--------------------------|---------------------|---------------------------------------------------|
| 10.633                  | 8.31310            | 999       | 1  | 0 | 0 | 10.623                   | 8.32100             | 0.010                                             |
| 16.210                  | 5.46360            | 51        | -1 | 1 | 0 | 16.202                   | 5.46640             | 0.008                                             |
| 19.115                  | 4.63930            | 14        | -1 | 1 | 1 | 19.107                   | 4.64130             | 0.009                                             |
| 21.348                  | 4.15870            | 99        | 2  | 0 | 0 | 21.339                   | 4.16050             | 0.009                                             |
| 24.222                  | 3.67150            | 27        | 0  | 0 | 2 | 24.208                   | 3.67360             | 0.014                                             |
| 24.657                  | 3.60770            | 134       | -2 | 1 | 0 | 24.651                   | 3.60860             | 0.006                                             |
| 25.832                  | 3.44610            | 38        | -2 | 1 | 1 | 25.829                   | 3.44660             | 0.004                                             |
| 27.419                  | 3.25020            | 81        | 0  | 2 | 1 | 27.412                   | 3.25100             | 0.007                                             |
| 27.675                  | 3.22070            | 16        | -1 | 1 | 2 | 27.678                   | 3.22040             | -0.003                                            |
| 28.139                  | 3.16860            | 28        | 1  | 0 | 2 | 28.151                   | 3.16730             | -0.012                                            |
| 29.164                  | 3.05960            | 15        | 2  | 1 | 1 | 29.113                   | 3.06490             | 0.051                                             |
| 29.544                  | 3.02110            | 21        | -2 | 0 | 2 | 29.548                   | 3.02070             | -0.004                                            |
| 30.250                  | 2.95220            | 37        | 1  | 2 | 1 | 30.235                   | 2.95360             | 0.015                                             |
| 32.248                  | 2.77370            | 167       | 3  | 0 | 0 | 32.248                   | 2.77370             | -0.001                                            |
| 33.665                  | 2.66010            | 20        | -2 | 2 | 1 | 33.656                   | 2.66080             | 0.009                                             |
| 34.606                  | 2.58990            | 13        | -3 | 1 | 0 | 34.597                   | 2.59060             | 0.009                                             |
| 35.213                  | 2.54660            | 13        | 2  | 0 | 2 | 35.208                   | 2.54700             | 0.006                                             |
| 37.096                  | 2.42160            | 17        | -3 | 0 | 2 | 37.111                   | 2.42060             | -0.015                                            |
| 37.370                  | 2.40440            | 12        | 2  | 1 | 2 | 37.393                   | 2.40300             | -0.023                                            |
| 38.583                  | 2.33160            | 27        | 3  | 1 | 1 | 38.615                   | 2.32970             | -0.032                                            |
| 38.723                  | 2.32350            | 32        | 0  | 1 | 3 | 38.778                   | 2.32030             | -0.055                                            |
| 40.128                  | 2.24530            | 13        | -1 | 3 | 1 | 40.154                   | 2.24390             | -0.027                                            |
| 41.118                  | 2.19350            | 30        | -3 | 2 | 1 | 41.124                   | 2.19320             | -0.006                                            |
| 43.208*                 | 2.09210            | 34        |    |   |   |                          |                     |                                                   |
| 43.464                  | 2.08040            | 35        | 4  | 0 | 0 | 43.467                   | 2.08020             | -0.004                                            |
| 44.451                  | 2.03650            | 19        | 3  | 2 | 1 | 44.469                   | 2.03570             | -0.018                                            |
| 45.021                  | 2.01200            | 10        | -3 | 2 | 2 | 44.995                   | 2.01310             | 0.026                                             |
| 46.087                  | 1.96790            | 14        | 2  | 3 | 1 | 46.127                   | 1.96630             | -0.039                                            |
| 46.737                  | 1.94200            | 10        | -3 | 1 | 3 | 46.780                   | 1.94040             | -0.043                                            |

|         |         |    |    |   |   |        |         |        |
|---------|---------|----|----|---|---|--------|---------|--------|
| 46.926  | 1.93470 | 19 | -2 | 2 | 3 | 46.926 | 1.93470 | 0.000  |
| 47.583  | 1.90950 | 11 | 1  | 2 | 3 | 47.555 | 1.91050 | 0.028  |
| 48.083  | 1.89080 | 9  | -4 | 1 | 2 | 48.077 | 1.89100 | 0.006  |
| 48.928  | 1.86010 | 14 | -1 | 0 | 4 | 48.886 | 1.86160 | 0.042  |
| 50.057  | 1.82070 | 10 | -3 | 3 | 0 | 50.016 | 1.82210 | 0.041  |
| 50.249* | 1.81420 | 9  |    |   |   |        |         |        |
| 52.972  | 1.72720 | 14 | -1 | 3 | 3 | 53.011 | 1.72600 | -0.039 |
| 53.178  | 1.72100 | 9  | 0  | 3 | 3 | 53.203 | 1.72020 | -0.026 |
| 54.045  | 1.69540 | 14 | 4  | 2 | 1 | 54.052 | 1.69520 | -0.007 |
| 54.243  | 1.68970 | 9  | -4 | 1 | 3 | 54.222 | 1.69030 | 0.021  |
| 54.401  | 1.68520 | 9  | 1  | 1 | 4 | 54.401 | 1.68520 | 0.000  |
| 55.897  | 1.64360 | 14 | -5 | 1 | 1 | 55.944 | 1.64230 | -0.048 |
| 56.682  | 1.62270 | 15 | -5 | 1 | 0 | 56.706 | 1.62200 | -0.024 |
| 58.205  | 1.58380 | 12 | -4 | 3 | 1 | 58.194 | 1.58400 | 0.012  |
| 58.567  | 1.57480 | 10 | -4 | 3 | 0 | 58.494 | 1.57660 | 0.073  |
| 59.075  | 1.56250 | 8  | 1  | 2 | 4 | 59.044 | 1.56330 | 0.032  |
| 59.438  | 1.55380 | 8  | -2 | 4 | 2 | 59.419 | 1.55430 | 0.018  |

\* These diffraction lines can be caused by the reflections of copper originated from the sample holder



**Table 5: Ba(CH<sub>3</sub>PO<sub>3</sub>H)<sub>2</sub>·H<sub>2</sub>O**

Indexed by ITO12 using first 40 lines

M(20) = 90.6

TRICLINIC

a = 7.3283 Å

b = 9.3571 Å

c = 7.2909 Å

 $\alpha$  = 94.352° $\beta$  = 110.859° $\gamma$  = 88.070°V = 465.82 Å<sup>3</sup>

| Experimental: |         |         |      |    |    |    | Calculated: |         |
|---------------|---------|---------|------|----|----|----|-------------|---------|
| c.            | 2*theta | d [Å]   | int. | h  | k  | l  | 2*theta     | d [Å]   |
| 1             | 9.472   | 9.34010 | 100  | 0  | 1  | 0  | 9.472       | 9.32983 |
| 2             | 12.915  | 6.85488 | 18   | 1  | 0  | 0  | 12.918      | 6.84783 |
| 3             | 14.736  | 6.01095 | 30   | -1 | 0  | 1  | 14.739      | 6.00547 |
|               |         |         |      | 1  | 0  | -1 | 14.739      | 6.00547 |
| 4             | 15.578  | 5.68768 | 4    | 0  | -1 | 1  | 15.583      | 5.68189 |
| 5             | 16.093  | 5.50690 | 2    | -1 | 1  | 0  | 16.097      | 5.50172 |
| 6             | 16.637  | 5.32795 | 1    | 0  | 1  | 1  | 16.641      | 5.32318 |
| 7             | 17.002  | 5.21417 | 9    | 1  | 1  | -1 | 17.003      | 5.21045 |
| 8             | 18.084  | 4.90450 | 1    | -1 | 1  | 1  | 18.078      | 4.90309 |
| 9             | 19.002  | 4.66928 | 9    | 0  | 2  | 0  | 19.009      | 4.66491 |
| 10            | 21.417  | 4.14769 | 4    | 1  | 0  | 1  | 21.422      | 4.14469 |
| 11            | 22.341  | 3.97809 | 29   | 0  | -2 | 1  | 22.346      | 3.97520 |
| 12            | 22.975  | 3.86970 | 1    | 1  | 2  | 0  | 22.973      | 3.86823 |
| 13            | 23.124  | 3.84512 | 2    | -1 | 2  | 0  | 23.128      | 3.84259 |
|               |         |         |      | 1  | -1 | 1  | 23.135      | 3.84142 |
| 14            | 23.821  | 3.73411 | 27   | 1  | 1  | 1  | 23.796      | 3.73627 |
| 15            | 24.593  | 3.61856 | 3    | -2 | 0  | 1  | 24.596      | 3.61645 |
|               |         |         |      | 2  | 0  | -1 | 24.596      | 3.61645 |
| 16            | 24.740  | 3.59738 | 6    | -1 | 0  | 2  | 24.752      | 3.59400 |
|               |         |         |      | 1  | 0  | -2 | 24.752      | 3.59400 |
| 17            | 24.914  | 3.57267 | 8    | -1 | 2  | 1  | 24.918      | 3.57045 |
| 18            | 26.003  | 3.42533 | 17   | 2  | 0  | 0  | 26.003      | 3.42391 |
|               |         |         |      | 2  | 1  | -1 | 26.010      | 3.42306 |
| 19            | 26.199  | 3.40019 | 22   | 0  | 0  | 2  | 26.200      | 3.39856 |
| 20            | 26.799  | 3.32532 | 5    | -2 | 1  | 1  | 26.806      | 3.32313 |
| 21            | 27.278  | 3.26805 | 4    | -1 | 1  | 2  | 27.239      | 3.27130 |
|               |         |         |      | 0  | -1 | 2  | 27.284      | 3.26596 |
| 22            | 27.662  | 3.22352 | 14   | 2  | 1  | 0  | 27.666      | 3.22175 |
| 23            | 27.798  | 3.20806 | 11   | -2 | 1  | 0  | 27.797      | 3.20690 |
| 24            | 28.240  | 3.15878 | 6    | 1  | -2 | 1  | 28.240      | 3.15758 |
| 25            | 28.534  | 3.12689 | 7    | 0  | 1  | 2  | 28.538      | 3.12528 |
| 26            | 28.681  | 3.11119 | 6    | 0  | 3  | 0  | 28.682      | 3.10994 |
| 27            | 29.720  | 3.00467 | 13   | -2 | 0  | 2  | 29.729      | 3.00273 |

|    |        |         |    |    |    |    |        |         |
|----|--------|---------|----|----|----|----|--------|---------|
|    |        |         |    | 2  | 0  | -2 | 29.729 | 3.00273 |
| 28 | 30.181 | 2.95987 | 1  | 1  | 2  | -2 | 30.190 | 2.95794 |
| 29 | 30.601 | 2.92011 | 7  | 2  | 2  | -1 | 30.581 | 2.92099 |
| 30 | 30.765 | 2.90491 | 6  | 0  | -3 | 1  | 30.762 | 2.90416 |
| 31 | 31.475 | 2.84101 | 19 | 0  | -2 | 2  | 31.464 | 2.84095 |
|    |        |         |    | 1  | 3  | -1 | 31.474 | 2.84007 |
|    |        |         |    | 1  | 3  | 0  | 31.484 | 2.83926 |
| 32 | 31.652 | 2.82549 | 3  | -1 | 3  | 0  | 31.658 | 2.82402 |
| 33 | 31.936 | 2.80098 | 2  | -2 | 2  | 1  | 31.946 | 2.79921 |
| 34 | 32.299 | 2.77033 | 6  | 2  | 2  | 0  | 32.296 | 2.76968 |
| 35 | 32.443 | 2.75840 | 11 | 0  | 3  | 1  | 32.442 | 2.75752 |
| 36 | 32.521 | 2.75192 | 8  | -2 | 2  | 0  | 32.523 | 2.75086 |
| 37 | 33.187 | 2.69818 | 1  | 2  | 0  | 1  | 33.185 | 2.69748 |
| 38 | 33.294 | 2.68975 | 3  | -1 | 3  | 1  | 33.289 | 2.68933 |
|    |        |         |    | 1  | 0  | 2  | 33.304 | 2.68812 |
| 39 | 33.641 | 2.66282 | 4  | 0  | 2  | 2  | 33.646 | 2.66159 |
| 40 | 34.208 | 2.61994 | 1  | 1  | -1 | 2  | 34.209 | 2.61904 |
| 41 | 34.782 | 2.57797 | 1  | 2  | 1  | 1  | 34.790 | 2.57659 |
| 42 | 36.622 | 2.45256 | 1  | -2 | 2  | 2  | 36.626 | 2.45155 |
| 43 | 36.738 | 2.44505 | 3  | 1  | 3  | -2 | 36.718 | 2.44561 |
|    |        |         |    | 1  | 3  | 1  | 36.742 | 2.44406 |
| 44 | 37.085 | 2.42294 | 2  | -1 | 0  | 3  | 37.081 | 2.42252 |
|    |        |         |    | 1  | 0  | -3 | 37.081 | 2.42252 |
| 45 | 37.277 | 2.41093 | 5  | 2  | 3  | -1 | 37.266 | 2.41094 |
| 46 | 37.619 | 2.38975 | 2  | 1  | 1  | -3 | 37.618 | 2.38916 |
| 47 | 37.747 | 2.38199 | 3  | 1  | -2 | 2  | 37.726 | 2.38258 |
|    |        |         |    | 3  | 1  | -1 | 37.764 | 2.38025 |
| 48 | 38.390 | 2.34354 | 3  | -3 | 1  | 1  | 38.388 | 2.34300 |
| 49 | 38.915 | 2.31310 | 6  | -3 | 0  | 2  | 38.920 | 2.31218 |
|    |        |         |    | 2  | 2  | 1  | 38.893 | 2.31370 |
|    |        |         |    | 3  | 0  | -2 | 38.920 | 2.31218 |
| 50 | 39.085 | 2.30340 | 4  | -2 | 0  | 3  | 39.093 | 2.30237 |
|    |        |         |    | -1 | 1  | 3  | 39.086 | 2.30276 |
|    |        |         |    | 2  | 0  | -3 | 39.093 | 2.30237 |
| 51 | 39.605 | 2.27434 | 4  | 2  | 1  | -3 | 39.583 | 2.27499 |
|    |        |         |    | 3  | 1  | -2 | 39.618 | 2.27301 |
| 52 | 39.972 | 2.25431 | 3  | 0  | -4 | 1  | 39.966 | 2.25403 |
| 53 | 40.602 | 2.22079 | 2  | 0  | 3  | 2  | 40.607 | 2.21993 |
|    |        |         |    | 1  | 2  | -3 | 40.611 | 2.21971 |
|    |        |         |    | 3  | 1  | 0  | 40.589 | 2.22088 |
| 54 | 40.764 | 2.21231 | 1  | -3 | 1  | 0  | 40.729 | 2.21357 |
|    |        |         |    | 1  | 4  | 0  | 40.745 | 2.21273 |
| 55 | 40.936 | 2.20341 | 4  | -1 | 4  | 0  | 40.931 | 2.20309 |
| 56 | 41.760 | 2.16179 | 3  | 0  | 4  | 1  | 41.760 | 2.16125 |
| 57 | 42.310 | 2.13496 | 2  | -3 | 2  | 1  | 42.305 | 2.13466 |
| 58 | 42.443 | 2.12859 | 4  | 2  | 2  | -3 | 42.437 | 2.12834 |
| 59 | 43.152 | 2.09522 | 2  | 0  | -2 | 3  | 43.143 | 2.09515 |
| 60 | 43.338 | 2.08667 | 4  | -1 | 2  | 3  | 43.335 | 2.08630 |
|    |        |         |    | 1  | -3 | 2  | 43.311 | 2.08738 |
| 61 | 43.639 | 2.07294 | 3  | 2  | 0  | 2  | 43.642 | 2.07234 |
| 62 | 43.922 | 2.06024 | 3  | 2  | -3 | 1  | 43.921 | 2.05980 |

|    |        |         |   |    |    |    |        |         |
|----|--------|---------|---|----|----|----|--------|---------|
| 63 | 44.018 | 2.05596 | 1 | 3  | 2  | 0  | 44.004 | 2.05612 |
| 64 | 44.381 | 2.03999 | 3 | 2  | -1 | 2  | 44.387 | 2.03924 |
| 65 | 44.651 | 2.02829 | 2 | -3 | 2  | 2  | 44.630 | 2.02870 |
|    |        |         |   | 1  | 4  | -2 | 44.640 | 2.02829 |
| 66 | 44.924 | 2.01658 | 3 | 2  | 3  | 1  | 44.918 | 2.01638 |
| 67 | 45.156 | 2.00678 | 2 | -2 | 2  | 3  | 45.157 | 2.00627 |
|    |        |         |   | 2  | 1  | 2  | 45.134 | 2.00721 |
| 68 | 45.294 | 2.00098 | 4 | -3 | 0  | 3  | 45.263 | 2.00182 |
|    |        |         |   | 1  | 4  | 1  | 45.283 | 2.00096 |
|    |        |         |   | 2  | 4  | -1 | 45.292 | 2.00059 |
|    |        |         |   | 3  | 0  | -3 | 45.263 | 2.00182 |
| 69 | 45.676 | 1.98513 | 3 | 0  | 2  | 3  | 45.659 | 1.98536 |
|    |        |         |   | 1  | 3  | -3 | 45.659 | 1.98535 |
|    |        |         |   | 1  | 3  | 2  | 45.693 | 1.98396 |
|    |        |         |   | 3  | 1  | -3 | 45.677 | 1.98462 |
| 70 | 47.021 | 1.93140 | 1 | -3 | 1  | 3  | 47.020 | 1.93103 |
| 71 | 47.140 | 1.92680 | 1 | 3  | -1 | 1  | 47.124 | 1.92699 |
| 72 | 47.285 | 1.92123 | 4 | -2 | 4  | 0  | 47.272 | 1.92129 |
|    |        |         |   | -2 | 4  | 1  | 47.253 | 1.92204 |
|    |        |         |   | 2  | -2 | 2  | 47.288 | 1.92071 |
| 73 | 48.062 | 1.89196 | 2 | -1 | 4  | 2  | 48.053 | 1.89190 |
|    |        |         |   | 1  | 1  | 3  | 48.072 | 1.89120 |
| 74 | 48.777 | 1.86588 | 1 | 0  | 5  | 0  | 48.764 | 1.86597 |
| 75 | 49.746 | 1.83176 | 1 | 0  | -5 | 1  | 49.738 | 1.83167 |
| 76 | 50.182 | 1.81687 | 1 | 1  | 5  | -1 | 50.179 | 1.81660 |
| 77 | 50.431 | 1.80848 | 1 | -4 | 0  | 2  | 50.428 | 1.80822 |
|    |        |         |   | 1  | -4 | 2  | 50.427 | 1.80824 |
|    |        |         |   | 4  | 0  | -2 | 50.428 | 1.80822 |
| 78 | 50.773 | 1.79710 | 3 | -3 | 2  | 3  | 50.775 | 1.79667 |
|    |        |         |   | -2 | 0  | 4  | 50.765 | 1.79700 |
|    |        |         |   | -1 | 5  | 0  | 50.763 | 1.79707 |
|    |        |         |   | 2  | 0  | -4 | 50.765 | 1.79700 |
| 79 | 51.455 | 1.77485 | 1 | 0  | 3  | 3  | 51.459 | 1.77439 |
| 80 | 52.377 | 1.74577 | 3 | 2  | 4  | 1  | 52.363 | 1.74585 |
| 81 | 53.522 | 1.71108 | 1 | 4  | 0  | 0  | 53.481 | 1.71196 |
|    |        |         |   | 4  | 2  | -2 | 53.496 | 1.71153 |
|    |        |         |   | 4  | 2  | -1 | 53.525 | 1.71065 |
| 82 | 53.918 | 1.69943 | 1 | 0  | 0  | 4  | 53.912 | 1.69928 |
|    |        |         |   | 1  | -3 | 3  | 53.928 | 1.69882 |
| 83 | 54.488 | 1.68301 | 1 | -4 | 0  | 3  | 54.481 | 1.68289 |
|    |        |         |   | 0  | -4 | 3  | 54.450 | 1.68378 |
|    |        |         |   | 4  | 0  | -3 | 54.481 | 1.68289 |
| 84 | 54.840 | 1.67301 | 2 | 3  | 1  | -4 | 54.849 | 1.67245 |
|    |        |         |   | 4  | 1  | -3 | 54.824 | 1.67315 |
| 85 | 55.244 | 1.66175 | 1 | -4 | 2  | 2  | 55.239 | 1.66156 |
| 86 | 56.241 | 1.63462 | 2 | -3 | 3  | 3  | 56.239 | 1.63436 |
|    |        |         |   | 2  | 5  | -2 | 56.234 | 1.63452 |
| 87 | 57.035 | 1.61373 | 1 | 1  | 3  | 3  | 57.023 | 1.61375 |
|    |        |         |   | 4  | 2  | -3 | 57.049 | 1.61309 |
| 88 | 57.446 | 1.60316 | 1 | -4 | 2  | 0  | 57.423 | 1.60345 |
|    |        |         |   | 2  | 1  | 3  | 57.433 | 1.60319 |

**Table 6: Ba(CH<sub>3</sub>PO<sub>3</sub>H)<sub>2</sub>**

TREOR90:

M(20) = 14

F(20) = 17.0(0.013828, 86)

CHEKCELL (cell refinement):

Monoclinic P2<sub>1</sub>/m

a = 11.5798 (28) Å

b = 15.5863 (54) Å

c = 4.8983 (21) Å

β = 98.58 (1)°

V = 874.19 (8) Å<sup>3</sup>

| 2θ <sub>obs</sub> | d <sub>obs</sub> Å | Intensity | h  | k | l | 2θ <sub>calc</sub> | d <sub>calc</sub> Å | 2θ <sub>obs</sub> -2θ <sub>calc</sub> |
|-------------------|--------------------|-----------|----|---|---|--------------------|---------------------|---------------------------------------|
| 7.731             | 11.43520           | 999       | 1  | 0 | 0 | 7.721              | 11.44980            | 0.010                                 |
| 13.760            | 6.43550            | 29        | -1 | 2 | 0 | 13.746             | 6.44240             | 0.015                                 |
| 15.488            | 5.72150            | 29        | 2  | 0 | 0 | 15.478             | 5.72500             | 0.010                                 |
| 20.959            | 4.23860            | 40        | 1  | 0 | 1 | 20.954             | 4.23960             | 0.005                                 |
| 22.211            | 4.00240            | 9         | -2 | 0 | 1 | 22.203             | 4.00380             | 0.008                                 |
| 22.898            | 3.88380            | 50        | -2 | 1 | 1 | 22.934             | 3.87790             | -0.035                                |
| 23.310            | 3.81610            | 46        | 3  | 0 | 0 | 23.307             | 3.81660             | 0.003                                 |
| 24.121            | 3.68960            | 12        | -1 | 4 | 0 | 24.127             | 3.68870             | -0.006                                |
| 25.019            | 3.55920            | 69        | -2 | 2 | 1 | 25.004             | 3.56130             | 0.015                                 |
| 25.807            | 3.45230            | 76        | 2  | 0 | 1 | 25.806             | 3.45240             | 0.001                                 |
| 26.035            | 3.42260            | 18        | -3 | 2 | 0 | 25.996             | 3.42760             | 0.039                                 |
| 27.512            | 3.24210            | 30        | -3 | 0 | 1 | 27.512             | 3.24200             | 0.000                                 |
| 29.867            | 2.99160            | 45        | -3 | 2 | 1 | 29.849             | 2.99330             | 0.018                                 |
| 31.242            | 2.86300            | 33        | 4  | 0 | 0 | 31.248             | 2.86250             | -0.006                                |
| 31.937            | 2.80220            | 38        | 3  | 0 | 1 | 31.946             | 2.80150             | -0.009                                |
| 33.287            | 2.69160            | 44        | -4 | 2 | 0 | 33.347             | 2.68700             | -0.060                                |
| 33.912            | 2.64340            | 32        | -4 | 0 | 1 | 33.918             | 2.64300             | -0.006                                |
| 36.016            | 2.49370            | 6         | -3 | 4 | 1 | 36.039             | 2.49220             | -0.023                                |
| 36.759            | 2.44500            | 10        | -1 | 0 | 2 | 36.771             | 2.44420             | -0.012                                |
| 38.114            | 2.36120            | 6         | -2 | 0 | 2 | 38.129             | 2.36030             | -0.015                                |
| 38.853            | 2.31790            | 20        | 4  | 0 | 1 | 38.860             | 2.31750             | -0.007                                |
| 39.333            | 2.29070            | 66        | 5  | 0 | 0 | 39.346             | 2.29000             | -0.013                                |
| 41.015            | 2.20060            | 36        | -5 | 0 | 1 | 41.007             | 2.20100             | 0.008                                 |
| 41.282            | 2.18700            | 11        | -4 | 4 | 1 | 41.276             | 2.18730             | 0.007                                 |
| 44.801            | 2.02300            | 7         | 0  | 7 | 1 | 44.801             | 2.02300             | 0.000                                 |
| 46.292            | 1.96130            | 3         | 5  | 0 | 1 | 46.315             | 1.96030             | -0.023                                |
| 47.384            | 1.91860            | 6         | 3  | 0 | 2 | 47.363             | 1.91940             | 0.021                                 |
| 47.626            | 1.90940            | 12        | 6  | 0 | 0 | 47.655             | 1.90830             | -0.029                                |
| 47.855            | 1.90080            | 5         | 5  | 2 | 1 | 47.847             | 1.90110             | 0.008                                 |
| 48.093            | 1.89190            | 4         | -6 | 1 | 0 | 48.033             | 1.89420             | 0.060                                 |

|        |         |   |    |   |   |        |         |        |
|--------|---------|---|----|---|---|--------|---------|--------|
| 48.582 | 1.87410 | 4 | -6 | 0 | 1 | 48.602 | 1.87330 | -0.020 |
| 49.121 | 1.85470 | 3 | -6 | 2 | 0 | 49.154 | 1.85360 | -0.033 |
| 52.091 | 1.75580 | 4 | -5 | 2 | 2 | 52.047 | 1.75720 | 0.044  |
| 55.450 | 1.65710 | 8 | -2 | 9 | 0 | 55.432 | 1.65760 | 0.018  |
| 55.644 | 1.65180 | 4 | 6  | 2 | 1 | 55.599 | 1.65300 | 0.045  |
| 56.242 | 1.63560 | 2 | 7  | 0 | 0 | 56.239 | 1.63570 | 0.003  |
| 56.645 | 1.62500 | 2 | -7 | 0 | 1 | 56.646 | 1.62490 | -0.001 |
| 57.993 | 1.59040 | 5 | -7 | 2 | 1 | 57.978 | 1.59070 | 0.015  |
| 64.995 | 1.43490 | 4 | 2  | 8 | 2 | 65.020 | 1.43440 | -0.025 |
| 65.137 | 1.43210 | 7 | -8 | 0 | 1 | 65.152 | 1.43180 | -0.015 |

**Table 7: Ba<sub>2</sub>(CH<sub>3</sub>PO<sub>3</sub>H)<sub>2</sub>(CH<sub>3</sub>PO<sub>3</sub>)·4H<sub>2</sub>O**

Indexed by ITO12 using first 40 lines

M(20) = 16.9

TRICLINIC

a = 9.7728 Å

b = 11.7776 Å

c = 8.7245 Å

 $\alpha = 103.489^\circ$  $\beta = 117.642^\circ$  $\gamma = 73.861^\circ$ V = 848.08 Å<sup>3</sup>

| Experimental: |            |          |      |    |    | Calculate: |            |          |  |
|---------------|------------|----------|------|----|----|------------|------------|----------|--|
| No            | 2 $\theta$ | d [Å]    | int. | h  | k  | l          | 2 $\theta$ | d [Å]    |  |
| 1             | 7.885      | 11.20286 | 100  | 0  | 1  | 0          | 7.868      | 11.22815 |  |
| 2             | 10.424     | 8.47948  | 2    | 1  | 0  | 0          | 10.414     | 8.48762  |  |
| 3             | 11.790     | 7.50018  | 2    | -1 | 0  | 1          | 11.782     | 7.50545  |  |
|               |            |          |      | 1  | 1  | 0          | 11.757     | 7.52118  |  |
| 4             | 14.289     | 6.19345  | 3    | -1 | 1  | 0          | 14.256     | 6.20786  |  |
| 5             | 14.758     | 5.99778  | 2    | 0  | 1  | 1          | 14.752     | 6.00033  |  |
| 6             | 15.799     | 5.60472  | 2    | 0  | 2  | 0          | 15.773     | 5.61407  |  |
| 7             | 19.975     | 4.44154  | 1    | 1  | 1  | 1          | 19.966     | 4.44352  |  |
| 8             | 20.625     | 4.30288  | 2    | -1 | 2  | 0          | 20.600     | 4.30809  |  |
| 9             | 20.924     | 4.24222  | 4    | -1 | 0  | 2          | 20.933     | 4.24035  |  |
|               |            |          |      | 2  | 0  | 0          | 20.916     | 4.24381  |  |
| 10            | 23.768     | 3.74065  | 2    | 0  | 3  | 0          | 23.754     | 3.74272  |  |
| 11            | 24.076     | 3.69343  | 5    | -1 | 1  | 2          | 24.087     | 3.69168  |  |
|               |            |          |      | 1  | 2  | 1          | 24.050     | 3.69730  |  |
| 12            | 24.351     | 3.65236  | 2    | 2  | 2  | -2         | 24.325     | 3.65613  |  |
| 13            | 26.488     | 3.36233  | 4    | 0  | -2 | 2          | 26.469     | 3.36471  |  |
| 14            | 27.875     | 3.19813  | 5    | -1 | 3  | 0          | 27.861     | 3.19968  |  |
| 15            | 28.290     | 3.15214  | 3    | 2  | 3  | -2         | 28.270     | 3.15431  |  |
| 16            | 28.401     | 3.14008  | 3    | 2  | 1  | 1          | 28.381     | 3.14223  |  |
| 17            | 29.198     | 3.05612  | 2    | -1 | 2  | 2          | 29.188     | 3.05710  |  |
| 18            | 29.801     | 2.99565  | 1    | 1  | 3  | 1          | 29.813     | 2.99444  |  |
| 19            | 30.524     | 2.92629  | 2    | 1  | 4  | -1         | 30.519     | 2.92681  |  |
| 20            | 30.646     | 2.91495  | 2    | 1  | 1  | 2          | 30.635     | 2.91597  |  |
| 21            | 30.891     | 2.89238  | 2    | 2  | 2  | 1          | 30.906     | 2.89095  |  |
| 22            | 31.275     | 2.85768  | 2    | 0  | -3 | 2          | 31.255     | 2.85952  |  |
| 23            | 31.512     | 2.83680  | 2    | 1  | 4  | 0          | 31.510     | 2.83693  |  |
| 24            | 31.870     | 2.80571  | 14   | 0  | 4  | 0          | 31.855     | 2.80704  |  |
| 25            | 32.088     | 2.78712  | 2    | 2  | 4  | -1         | 32.086     | 2.78733  |  |
| 26            | 32.364     | 2.76397  | 2    | -2 | 2  | 2          | 32.335     | 2.76646  |  |
| 27            | 33.786     | 2.65089  | 2    | 2  | 4  | -2         | 33.757     | 2.65310  |  |
| 28            | 33.908     | 2.64156  | 2    | 1  | 4  | -2         | 33.897     | 2.64243  |  |
| 29            | 35.337     | 2.53800  | 1    | 0  | 4  | 1          | 35.342     | 2.53760  |  |

|    |        |         |   |    |    |    |        |         |
|----|--------|---------|---|----|----|----|--------|---------|
| 30 | 35.471 | 2.52871 | 1 | -1 | 3  | 2  | 35.483 | 2.52790 |
|    |        |         |   | 0  | 3  | 2  | 35.478 | 2.52819 |
| 31 | 35.588 | 2.52067 | 3 | -1 | 4  | 0  | 35.582 | 2.52108 |
| 32 | 37.299 | 2.40888 | 1 | -1 | 4  | 1  | 37.328 | 2.40708 |
|    |        |         |   | 0  | -4 | 2  | 37.276 | 2.41031 |
|    |        |         |   | 4  | 2  | -2 | 37.299 | 2.40884 |
| 33 | 37.606 | 2.38987 | 1 | 4  | 1  | -1 | 37.612 | 2.38952 |
| 34 | 37.725 | 2.38266 | 1 | 1  | -4 | 1  | 37.716 | 2.38316 |
|    |        |         |   | 2  | 0  | 2  | 37.710 | 2.38356 |
| 35 | 38.282 | 2.34923 | 2 | 1  | 5  | -1 | 38.276 | 2.34957 |
|    |        |         |   | 2  | 1  | 2  | 38.301 | 2.34812 |
|    |        |         |   | 3  | 0  | 1  | 38.294 | 2.34853 |
| 36 | 38.608 | 2.33016 | 1 | -2 | 3  | 2  | 38.620 | 2.32945 |
|    |        |         |   | 1  | 3  | 2  | 38.608 | 2.33014 |
| 37 | 40.123 | 2.24559 | 7 | 0  | 5  | 0  | 40.122 | 2.24563 |
| 38 | 40.811 | 2.20932 | 2 | 1  | 5  | -2 | 40.801 | 2.20983 |
| 39 | 40.937 | 2.20279 | 1 | 1  | 0  | 3  | 40.951 | 2.20205 |
| 40 | 41.926 | 2.15310 | 2 | -2 | 4  | 0  | 41.906 | 2.15405 |
| 41 | 42.102 | 2.14448 | 1 | -4 | 0  | 3  | 42.114 | 2.14393 |
|    |        |         |   | -2 | 4  | 1  | 42.123 | 2.14348 |
|    |        |         |   | 0  | 4  | 2  | 42.125 | 2.14340 |
| 42 | 42.758 | 2.11312 | 1 | 3  | 3  | 1  | 42.764 | 2.11283 |
| 43 | 42.832 | 2.10961 | 2 | 3  | 5  | -1 | 42.821 | 2.11012 |
| 44 | 43.288 | 2.08846 | 2 | 0  | 5  | 1  | 43.313 | 2.08729 |
|    |        |         |   | 1  | -2 | 3  | 43.276 | 2.08902 |
| 45 | 47.177 | 1.92496 | 2 | 2  | 5  | 1  | 47.184 | 1.92468 |
|    |        |         |   | 3  | 4  | 1  | 47.187 | 1.92459 |
| 46 | 48.305 | 1.88259 | 1 | 1  | 6  | -2 | 48.310 | 1.88244 |
|    |        |         |   | 5  | 1  | -3 | 48.276 | 1.88368 |
| 47 | 49.090 | 1.85433 | 1 | 1  | 3  | 3  | 49.090 | 1.85432 |
| 48 | 49.484 | 1.84048 | 2 | -2 | 5  | 0  | 49.481 | 1.84059 |

**Table 8: Ba<sub>2</sub>(CH<sub>3</sub>PO<sub>3</sub>H)<sub>2</sub>(CH<sub>3</sub>PO<sub>3</sub>)**

Indexed by ITO12 using first 40 lines

M(20) = 26.3

TRICLINIC

a = 9.2837 Å

b = 12.0084 Å

c = 7.4711 Å

α = 95.661°

β = 91.916°

γ = 81.388°

V = 819.34 Å<sup>3</sup>

| No | Experimental: |          |      |    |    |    | Calculate: |          |
|----|---------------|----------|------|----|----|----|------------|----------|
|    | 2θ            | d [Å]    | int. | h  | k  | l  | 2θ         | d [Å]    |
| 1  | 7.444         | 11.86593 | 100  | 0  | 1  | 0  | 7.473      | 11.81958 |
| 2  | 13.038        | 6.78504  | 2    | -1 | 1  | 0  | 13.045     | 6.78126  |
| 3  | 13.402        | 6.60117  | 3    | 0  | -1 | 1  | 13.446     | 6.57963  |
| 4  | 14.628        | 6.05071  | 2    | 0  | 1  | 1  | 14.655     | 6.03976  |
| 5  | 14.941        | 5.92472  | 5    | 0  | 2  | 0  | 14.979     | 5.90979  |
| 6  | 16.539        | 5.35564  | 1    | 1  | 2  | 0  | 16.589     | 5.33946  |
| 7  | 19.658        | 4.51242  | 2    | 2  | 1  | 0  | 19.680     | 4.50740  |
| 8  | 21.772        | 4.07875  | 5    | -2 | 1  | 0  | 21.767     | 4.07976  |
|    |               |          |      | 1  | -2 | 1  | 21.802     | 4.07315  |
| 9  | 22.527        | 3.94370  | 4    | 0  | 3  | 0  | 22.550     | 3.93986  |
|    |               |          |      | 2  | 1  | -1 | 22.483     | 3.95132  |
| 10 | 22.667        | 3.91963  | 14   | 2  | 2  | 0  | 22.698     | 3.91435  |
| 11 | 23.892        | 3.72145  | 5    | 0  | 0  | 2  | 23.923     | 3.71666  |
| 12 | 24.385        | 3.64725  | 2    | 0  | -1 | 2  | 24.396     | 3.64574  |
| 13 | 24.501        | 3.63024  | 2    | 0  | -3 | 1  | 24.529     | 3.62620  |
| 14 | 24.690        | 3.60292  | 6    | 2  | -1 | 1  | 24.706     | 3.60063  |
| 15 | 24.806        | 3.58632  | 3    | 2  | 2  | -1 | 24.836     | 3.58202  |
| 16 | 25.014        | 3.55702  | 10   | -2 | 1  | 1  | 25.044     | 3.55283  |
|    |               |          |      | 1  | 3  | -1 | 25.044     | 3.55285  |
| 17 | 25.636        | 3.47209  | 5    | -1 | 0  | 2  | 25.668     | 3.46785  |
|    |               |          |      | 1  | 1  | -2 | 25.688     | 3.46516  |
| 18 | 25.971        | 3.42802  | 3    | 1  | 0  | 2  | 26.015     | 3.42237  |
| 19 | 26.219        | 3.39614  | 3    | -2 | 2  | 0  | 26.263     | 3.39063  |
| 20 | 26.540        | 3.35580  | 4    | 0  | 3  | 1  | 26.570     | 3.35216  |
|    |               |          |      | 2  | 2  | 1  | 26.539     | 3.35598  |
| 21 | 27.320        | 3.26181  | 8    | 1  | 1  | 2  | 27.341     | 3.25930  |
| 22 | 27.519        | 3.23860  | 10   | 2  | 3  | 0  | 27.561     | 3.23380  |
| 23 | 27.643        | 3.22435  | 6    | 1  | -3 | 1  | 27.707     | 3.21706  |
| 24 | 27.816        | 3.20473  | 4    | -1 | 1  | 2  | 27.812     | 3.20519  |
| 25 | 28.425        | 3.13739  | 4    | 2  | -2 | 1  | 28.466     | 3.13296  |
| 26 | 29.337        | 3.04194  | 6    | -2 | 2  | 1  | 29.367     | 3.03891  |
| 27 | 30.559        | 2.92305  | 3    | 1  | 2  | 2  | 30.582     | 2.92093  |



|    |        |         |   |    |    |    |        |         |
|----|--------|---------|---|----|----|----|--------|---------|
| 28 | 31.417 | 2.84513 | 4 | -3 | 0  | 1  | 31.384 | 2.84800 |
|    |        |         |   | 0  | -3 | 2  | 31.461 | 2.84126 |
|    |        |         |   | 3  | 0  | -1 | 31.384 | 2.84800 |
| 29 | 31.756 | 2.81551 | 4 | -1 | 2  | 2  | 31.717 | 2.81893 |
| 30 | 31.972 | 2.79701 | 4 | 3  | 1  | 1  | 31.968 | 2.79733 |
| 31 | 33.474 | 2.67484 | 5 | 3  | -1 | 1  | 33.474 | 2.67481 |
| 32 | 33.609 | 2.66442 | 4 | -3 | 1  | 1  | 33.595 | 2.66551 |
|    |        |         |   | 2  | -3 | 1  | 33.619 | 2.66365 |
| 33 | 34.340 | 2.60936 | 3 | 3  | 3  | 0  | 34.337 | 2.60957 |
| 34 | 34.491 | 2.59828 | 2 | 2  | 2  | 2  | 34.537 | 2.59491 |
| 35 | 34.890 | 2.56947 | 3 | -2 | 3  | 1  | 34.913 | 2.56781 |
| 36 | 34.992 | 2.56218 | 2 | 2  | 3  | -2 | 35.054 | 2.55779 |
| 37 | 36.211 | 2.47867 | 1 | 0  | 0  | 3  | 36.225 | 2.47778 |
| 38 | 36.867 | 2.43610 | 2 | -1 | 3  | 2  | 36.885 | 2.43495 |
| 39 | 37.350 | 2.40571 | 2 | -3 | 2  | 1  | 37.320 | 2.40756 |
|    |        |         |   | -1 | 0  | 3  | 37.383 | 2.40362 |
|    |        |         |   | 3  | 3  | 1  | 37.383 | 2.40365 |
| 40 | 37.983 | 2.36705 | 4 | 0  | -2 | 3  | 37.993 | 2.36642 |
|    |        |         |   | 0  | 5  | 0  | 38.035 | 2.36392 |
| 41 | 38.516 | 2.33548 | 3 | 1  | 2  | -3 | 38.518 | 2.33540 |
|    |        |         |   | 2  | 3  | 2  | 38.500 | 2.33644 |
| 42 | 38.769 | 2.32081 | 4 | 3  | 1  | 2  | 38.797 | 2.31923 |
| 43 | 39.145 | 2.29942 | 2 | -1 | 1  | 3  | 39.177 | 2.29759 |
|    |        |         |   | 3  | 4  | 0  | 39.110 | 2.30139 |
| 44 | 39.513 | 2.27886 | 2 | 2  | 4  | -2 | 39.582 | 2.27499 |
| 45 | 40.278 | 2.23728 | 2 | 4  | 1  | -1 | 40.300 | 2.23616 |
| 46 | 41.106 | 2.19411 | 3 | 0  | 5  | 1  | 41.118 | 2.19352 |
| 47 | 41.171 | 2.19081 | 3 | 4  | 1  | 1  | 41.212 | 2.18872 |
|    |        |         |   | 4  | 2  | -1 | 41.181 | 2.19032 |
| 48 | 41.495 | 2.17447 | 3 | -2 | 3  | 2  | 41.476 | 2.17538 |
| 49 | 42.339 | 2.13304 | 2 | 2  | -1 | 3  | 42.343 | 2.13284 |
| 50 | 43.252 | 2.09008 | 2 | 2  | 5  | 1  | 43.290 | 2.08837 |
| 51 | 43.539 | 2.07698 | 1 | 2  | 4  | 2  | 43.575 | 2.07535 |
| 52 | 43.852 | 2.06288 | 1 | 3  | 3  | 2  | 43.904 | 2.06057 |
| 53 | 44.318 | 2.04227 | 2 | 2  | -2 | 3  | 44.367 | 2.04013 |
| 54 | 45.260 | 2.00193 | 1 | 4  | 1  | -2 | 45.296 | 2.00041 |
| 55 | 45.537 | 1.99038 | 2 | 1  | 3  | 3  | 45.508 | 1.99159 |
| 56 | 45.611 | 1.98732 | 2 | 1  | 6  | 0  | 45.618 | 1.98703 |
| 57 | 45.947 | 1.97359 | 2 | 3  | 1  | -3 | 45.998 | 1.97151 |
| 58 | 46.039 | 1.96984 | 2 | 0  | 6  | 0  | 46.037 | 1.96993 |
| 59 | 46.705 | 1.94331 | 2 | -3 | 0  | 3  | 46.699 | 1.94354 |
| 60 | 47.360 | 1.91795 | 1 | 1  | 5  | 2  | 47.404 | 1.91627 |
| 61 | 47.603 | 1.90872 | 3 | 3  | 0  | 3  | 47.627 | 1.90781 |
| 62 | 48.224 | 1.88559 | 2 | -2 | 5  | 1  | 48.233 | 1.88524 |
|    |        |         |   | 2  | 3  | 3  | 48.224 | 1.88559 |
| 63 | 48.407 | 1.87889 | 2 | 3  | -1 | 3  | 48.435 | 1.87786 |
| 64 | 48.675 | 1.86915 | 1 | -3 | 1  | 3  | 48.701 | 1.86823 |
|    |        |         |   | -1 | 6  | 0  | 48.641 | 1.87038 |
| 65 | 48.858 | 1.86260 | 2 | 0  | -1 | 4  | 48.845 | 1.86307 |
| 66 | 49.090 | 1.85432 | 1 | 5  | 1  | 0  | 49.053 | 1.85564 |
| 67 | 49.449 | 1.84169 | 1 | 1  | 1  | -4 | 49.468 | 1.84104 |

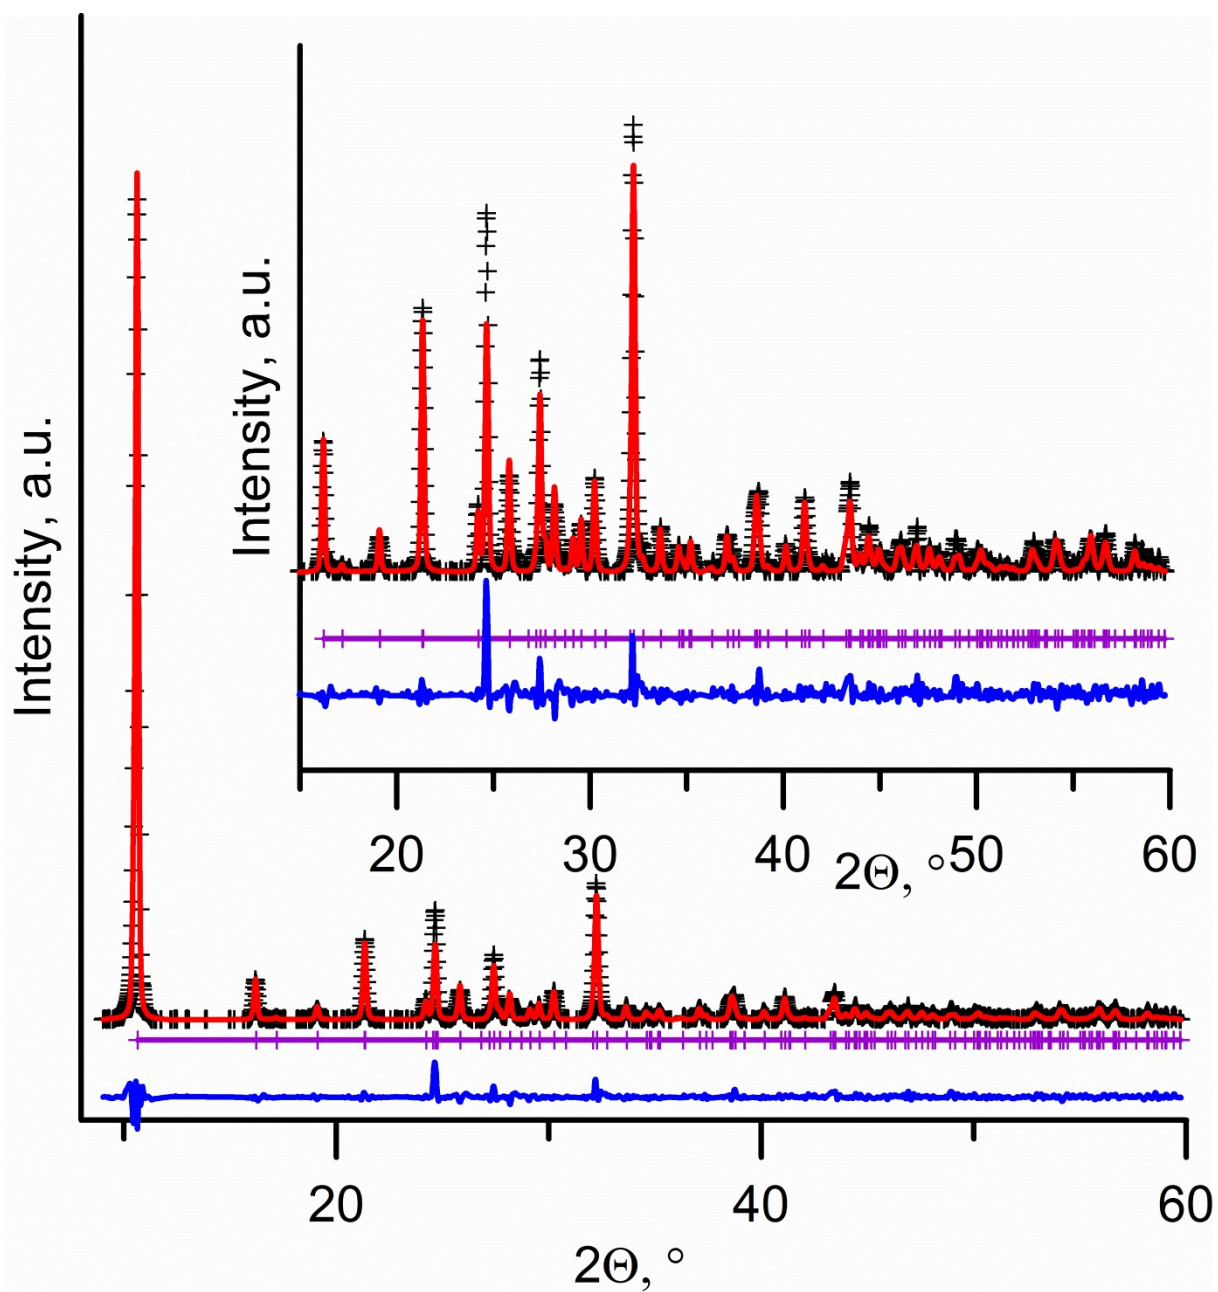

**Figure S1.** X-Ray powder pattern of  $\beta$ -BaCH<sub>3</sub>PO<sub>3</sub> with final Rietveld and difference plots.

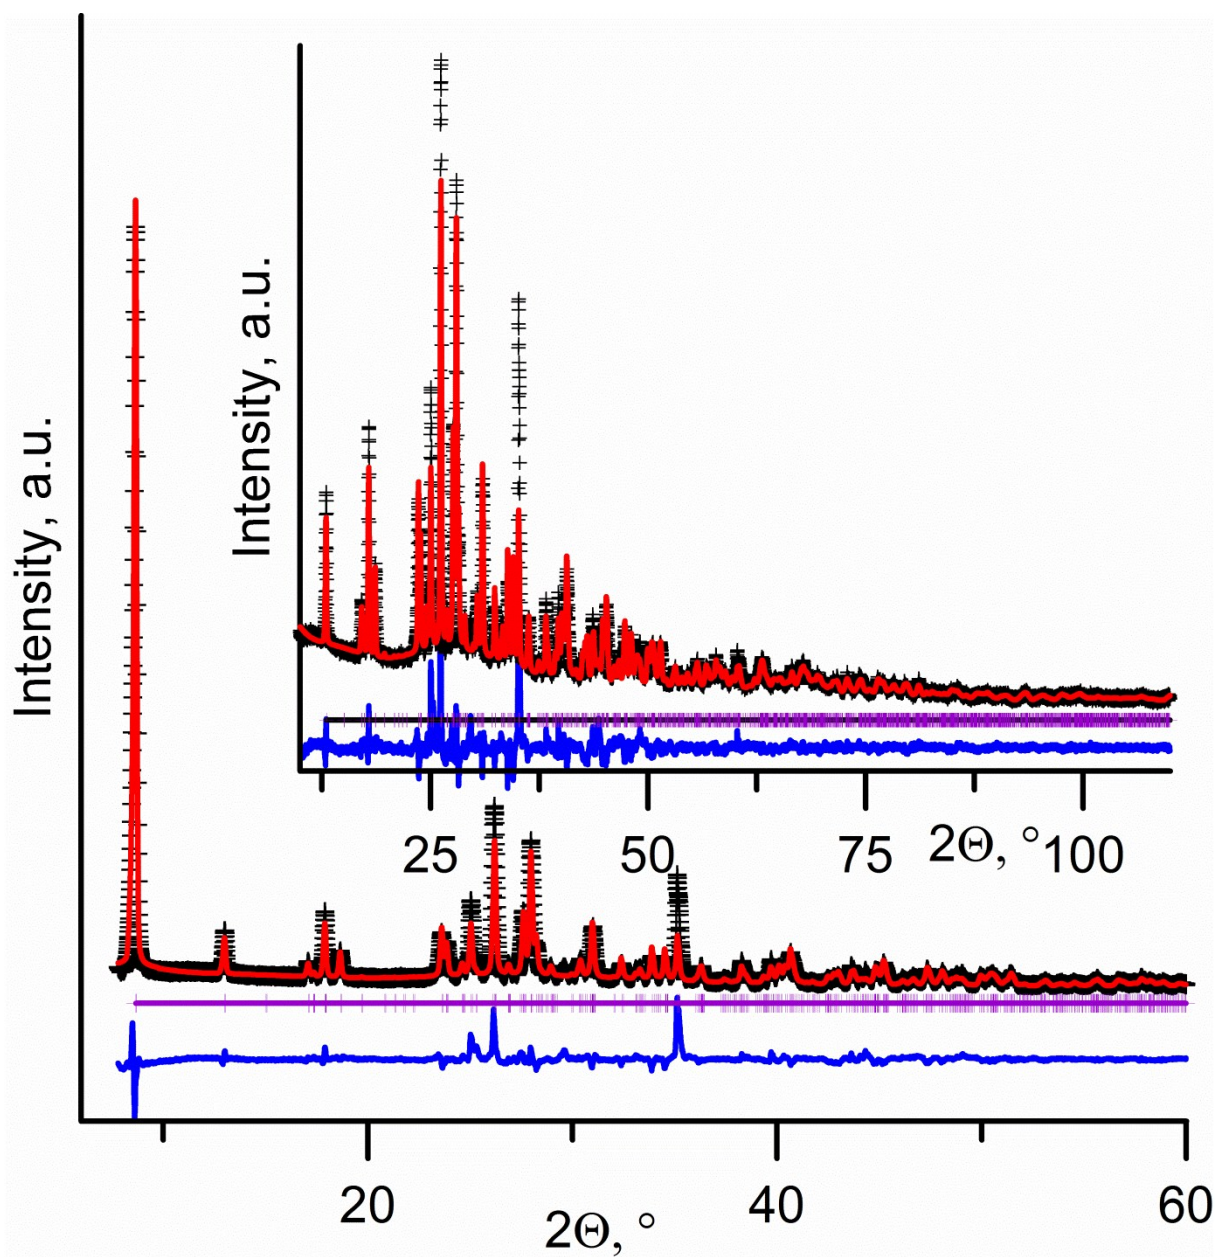

**Figure S2.** X-Ray powder pattern of BaCH<sub>3</sub>PO<sub>3</sub>·H<sub>2</sub>O with final Rietveld and difference plots.

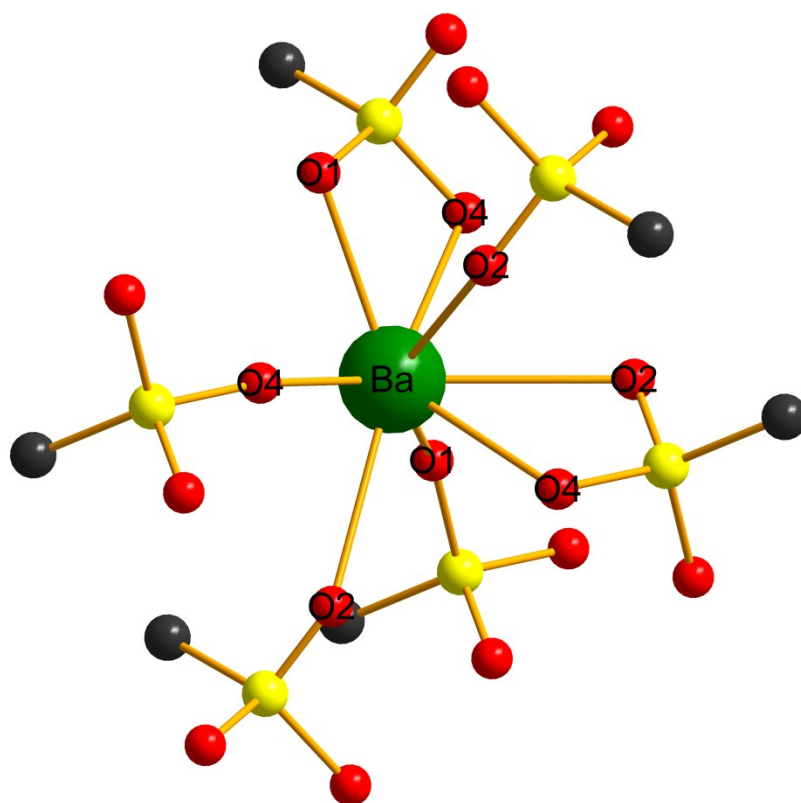

**Figure S3.** Bonding of the methylphosphonate ligands to the Ba atom in  $\beta$ -BaCH<sub>3</sub>PO<sub>3</sub> .

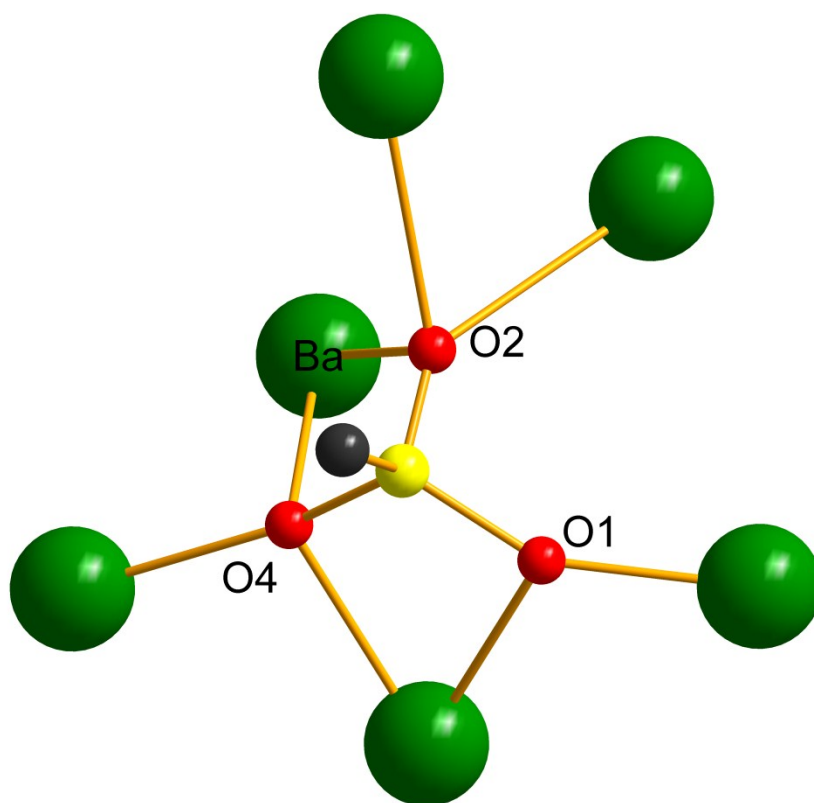

**Figure S4.** Coordination environment of the methylphosphonate ligand in  $\beta$ -BaCH<sub>3</sub>PO<sub>3</sub>.

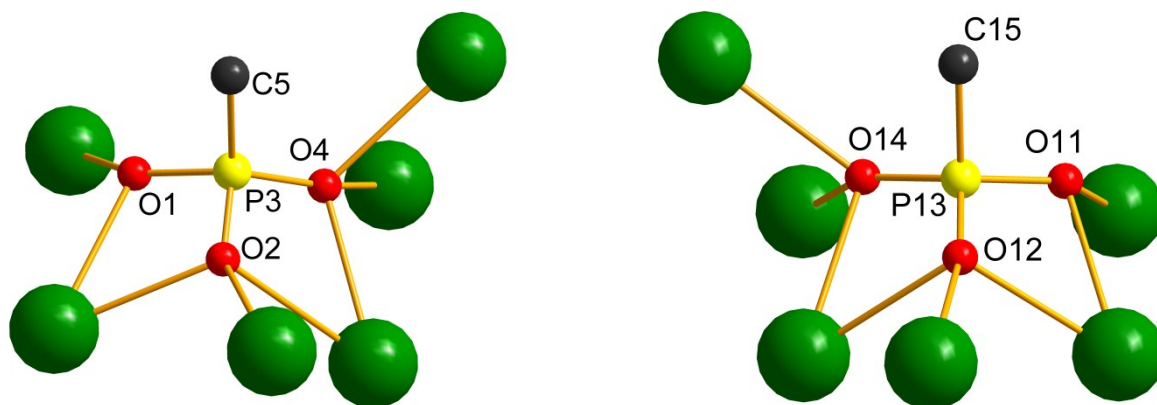



**Figure S5.** Coordination environment of the methylphosphonate ligands in  $\text{BaCH}_3\text{PO}_3 \cdot \text{H}_2\text{O}$ .

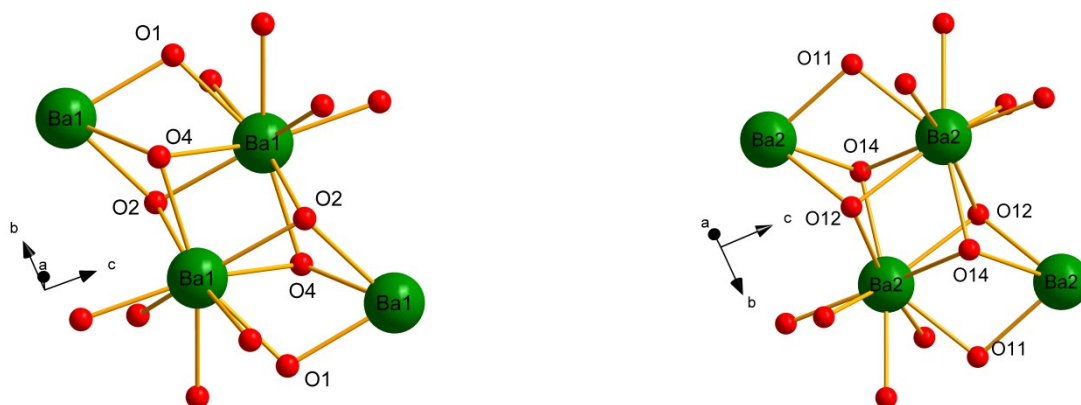

**Figure S6.** Fragment showing a connection between the Ba atoms in  $\text{BaCH}_3\text{PO}_3 \cdot \text{H}_2\text{O}$ .
